# Supplementary material
Source: ML conference proceedings conference paper supplement (https://openreview.net/forum?id=BW6oQ0qZl0El)
Supplement: supplementary_material [file attachment]

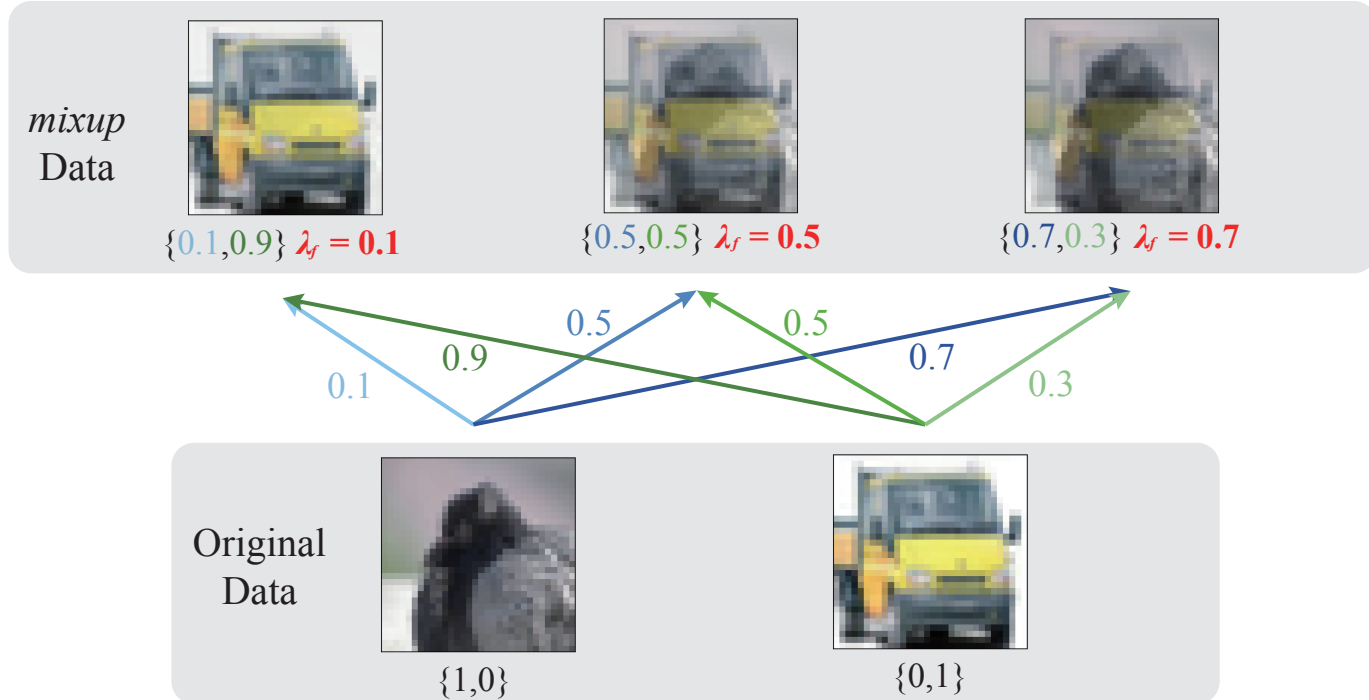

(a) How *mixup* data is constructed

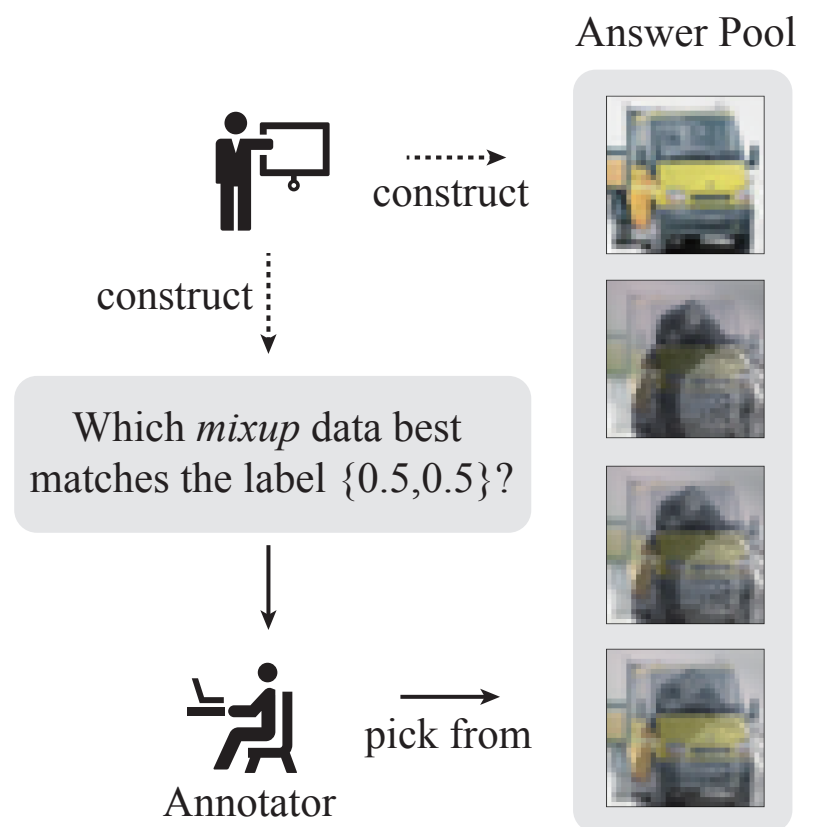

(b) Elicitation Setting I:

Endorse a synthetic image to match a label

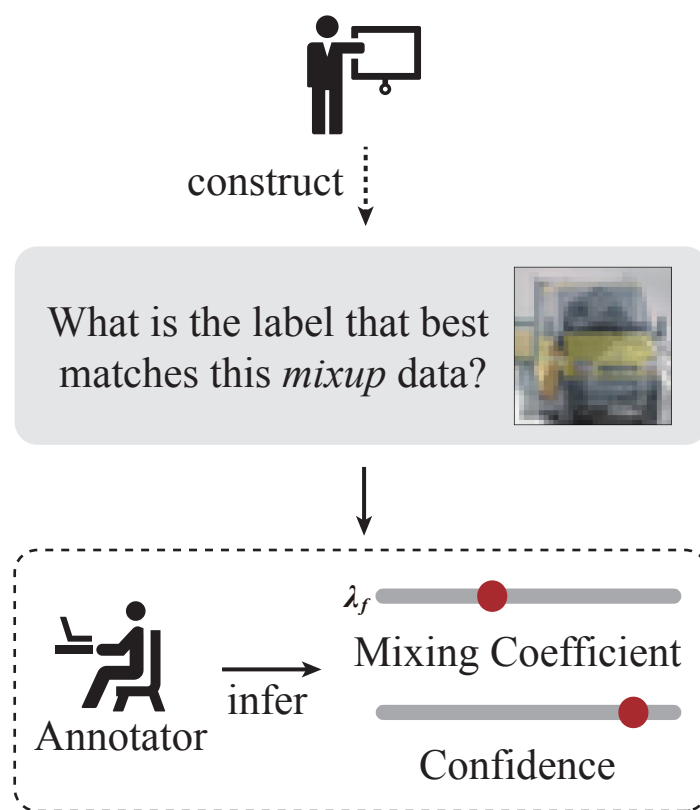

(c) Elicitation Setting II:

Infer the label for a synthetic image
