# Supplementary material
Source: ML conference proceedings conference paper supplement (https://openreview.net/forum?id=BW6oQ0qZl0El)

# Airplane-Deer Category Boundary

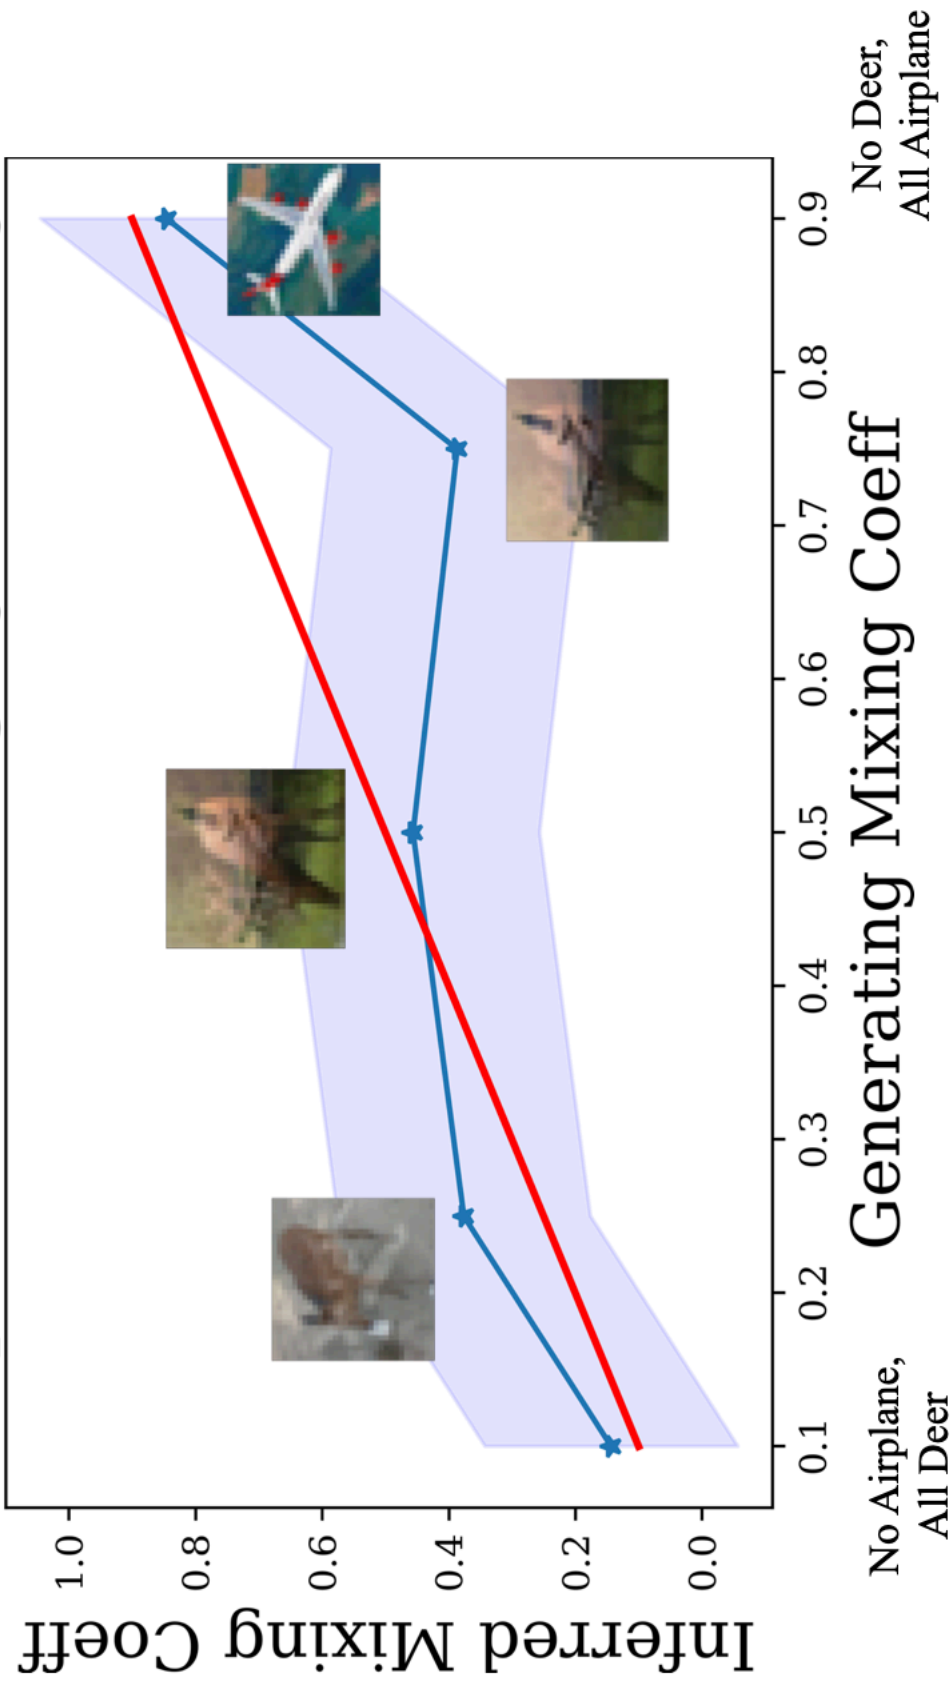

Supplement: supplementary_material [file attachment]

# Individual Selections for the Perceived 50/50 Point

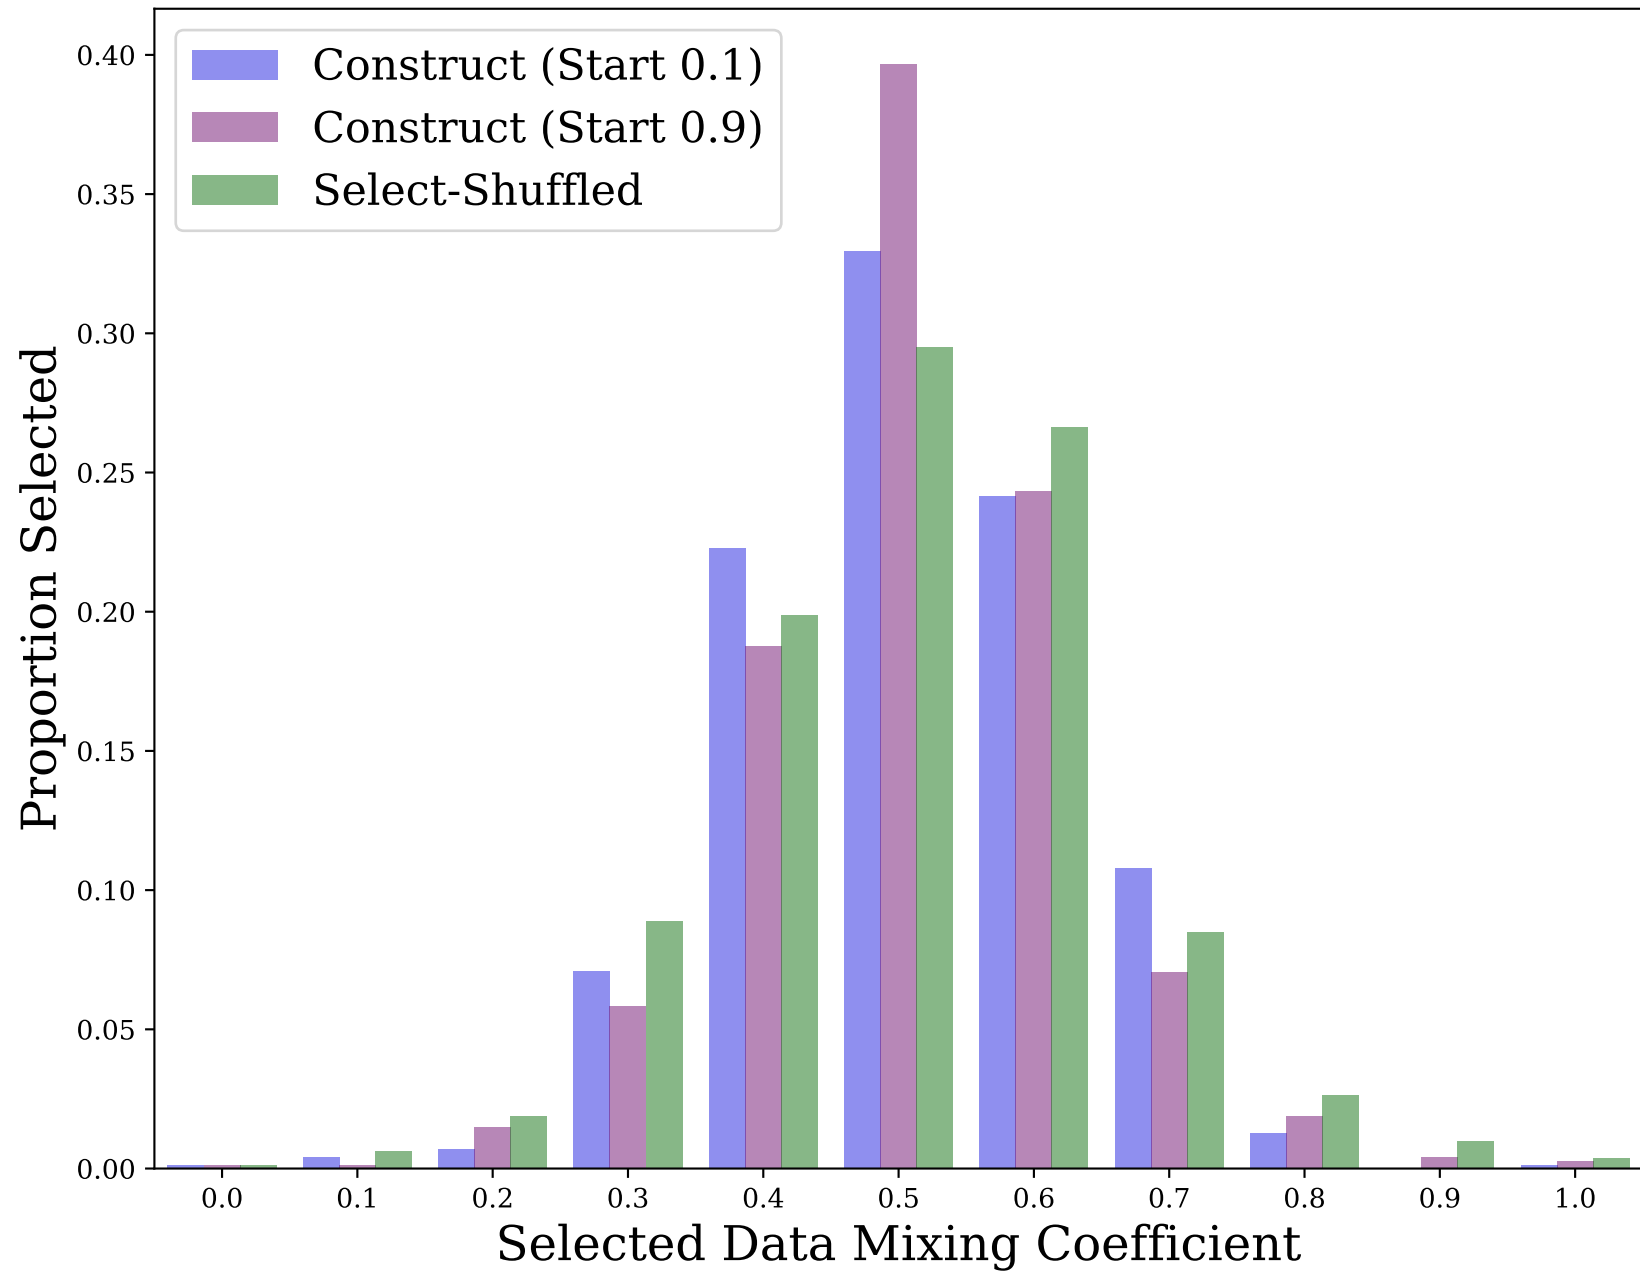

Supplement: supplementary_material [file attachment]

# Human-Inferred vs. Generating Mixing Coeff

Inferred Mixing Coeff

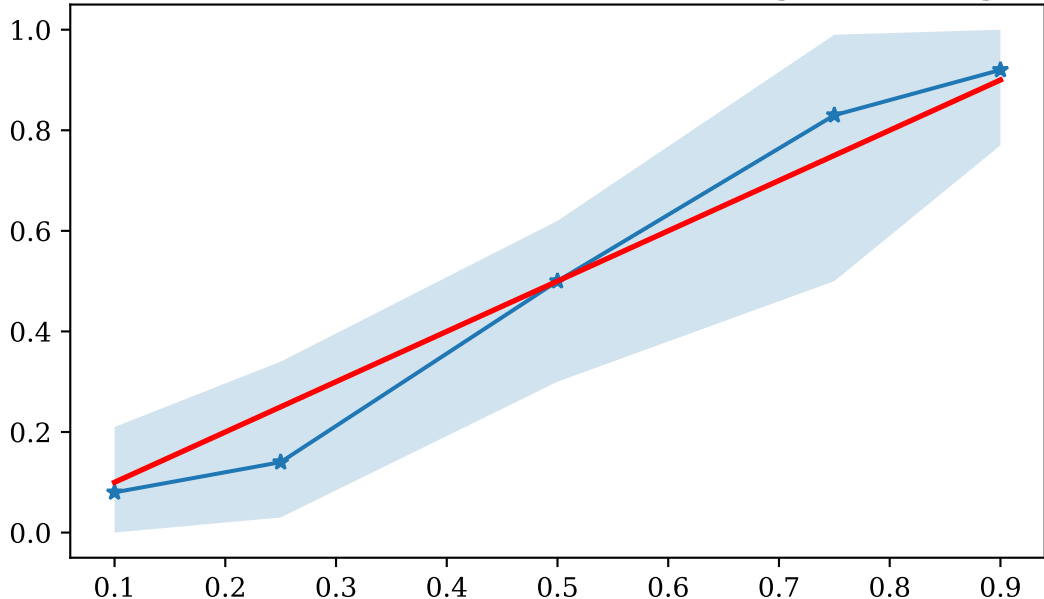

Generating Mixing Coeff

Supplement: supplementary_material [file attachment]

# Impact of Endpoint Entropy on Annotator Confidence

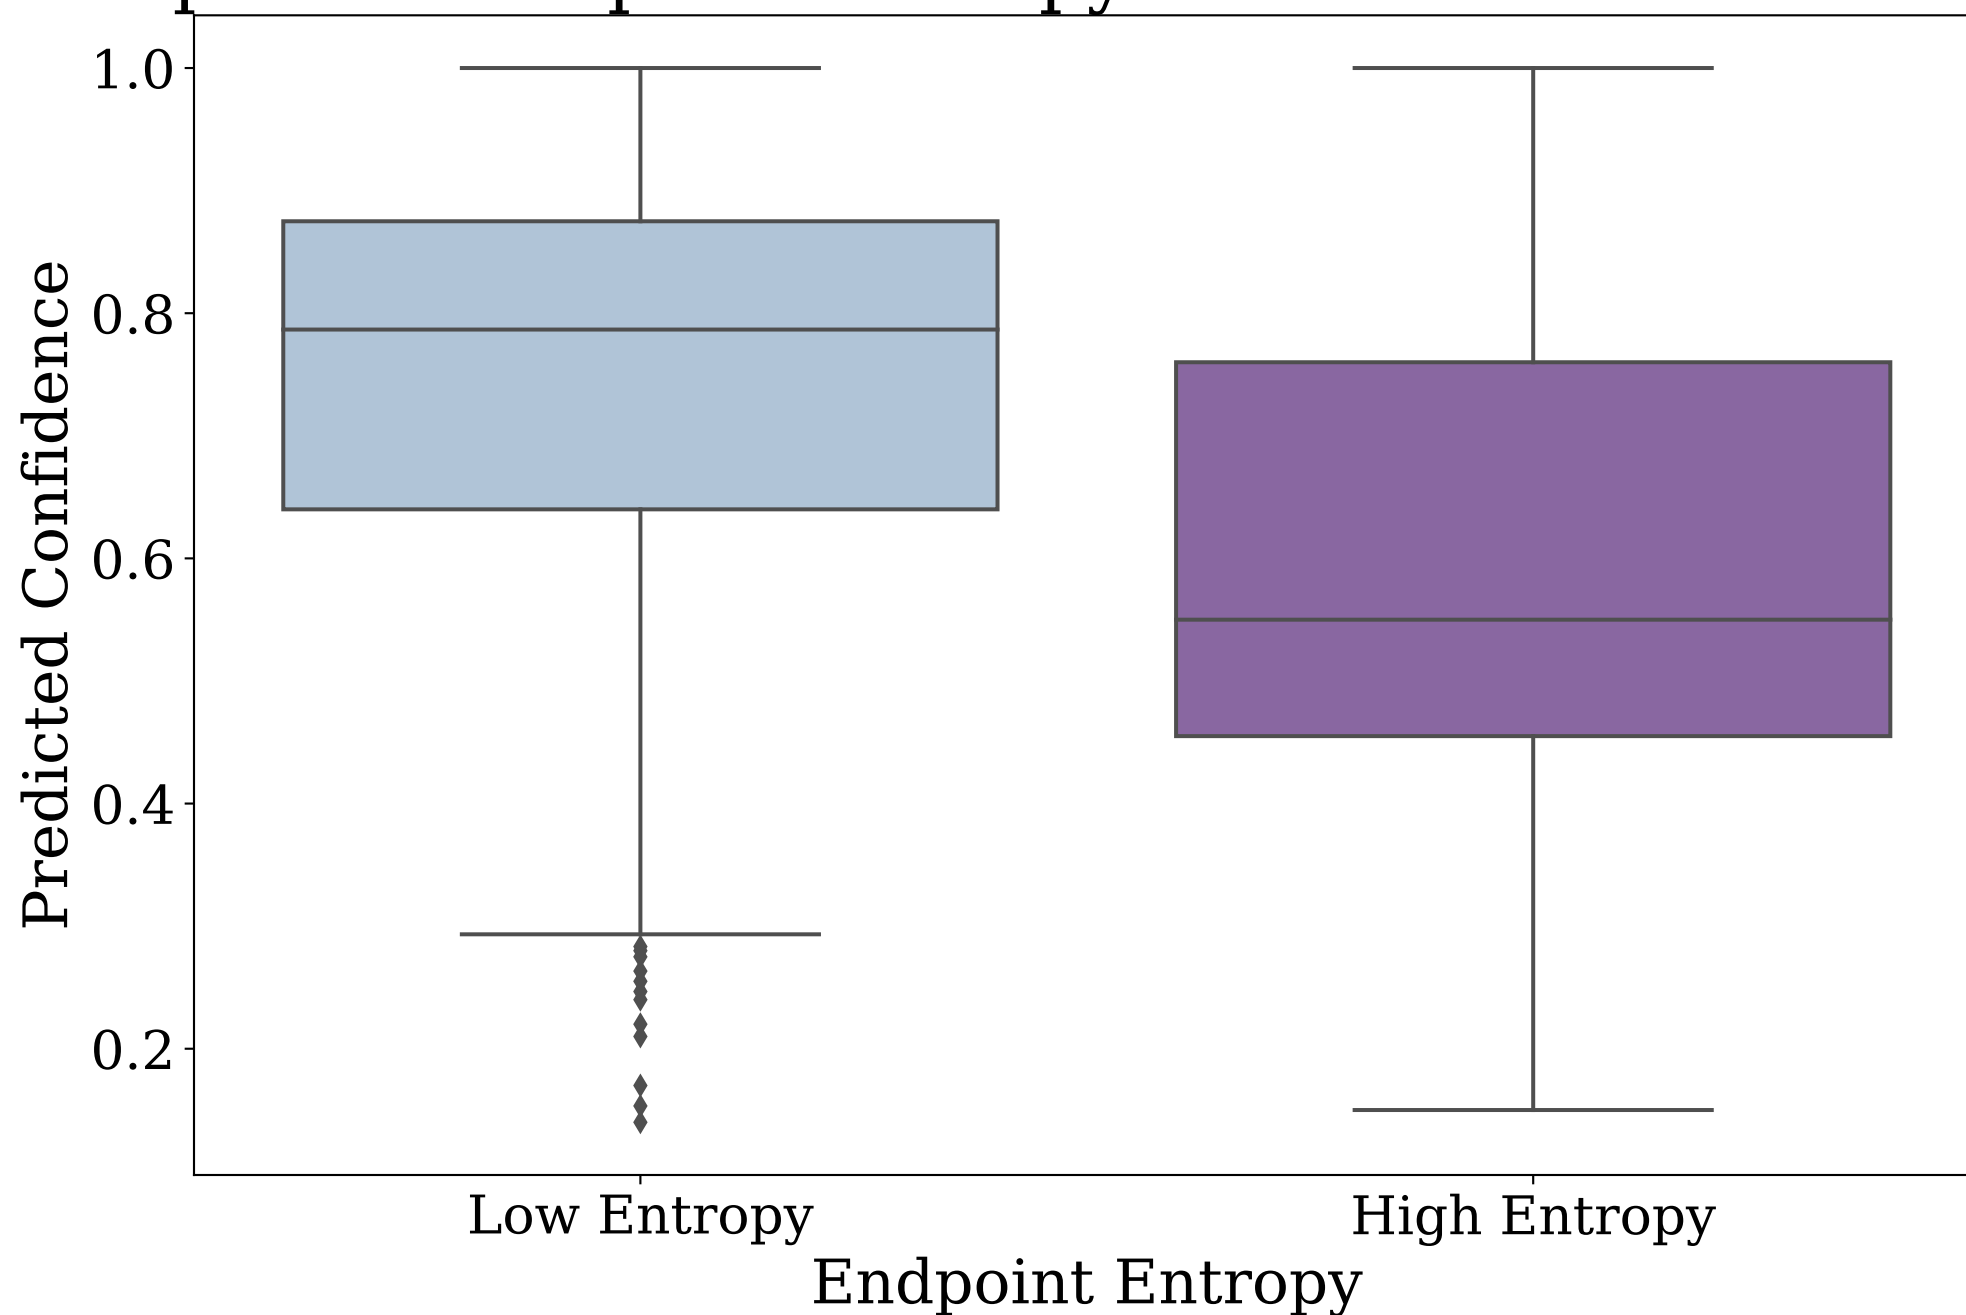

Supplement: supplementary_material [file attachment]

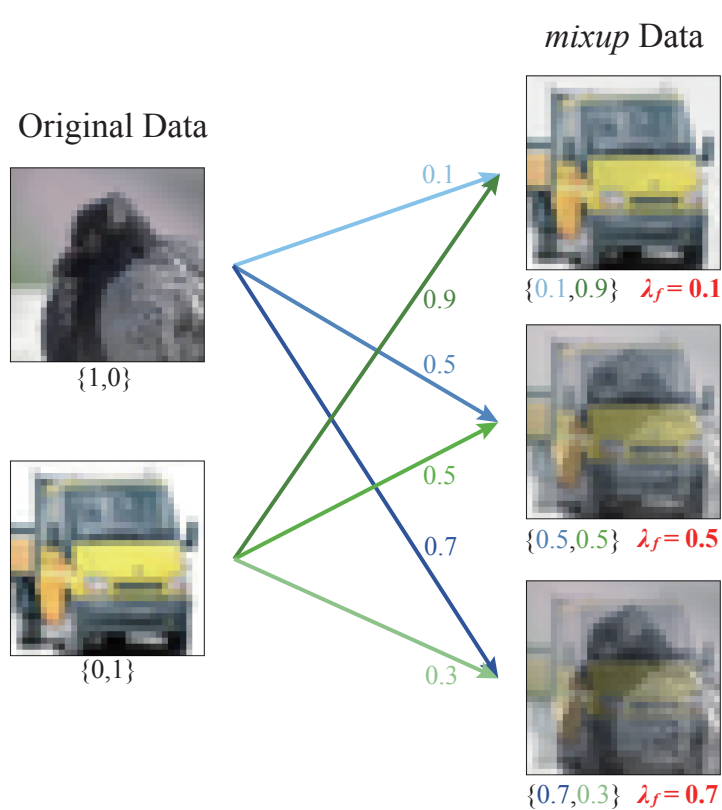

(a) How *mixup* data is constructed

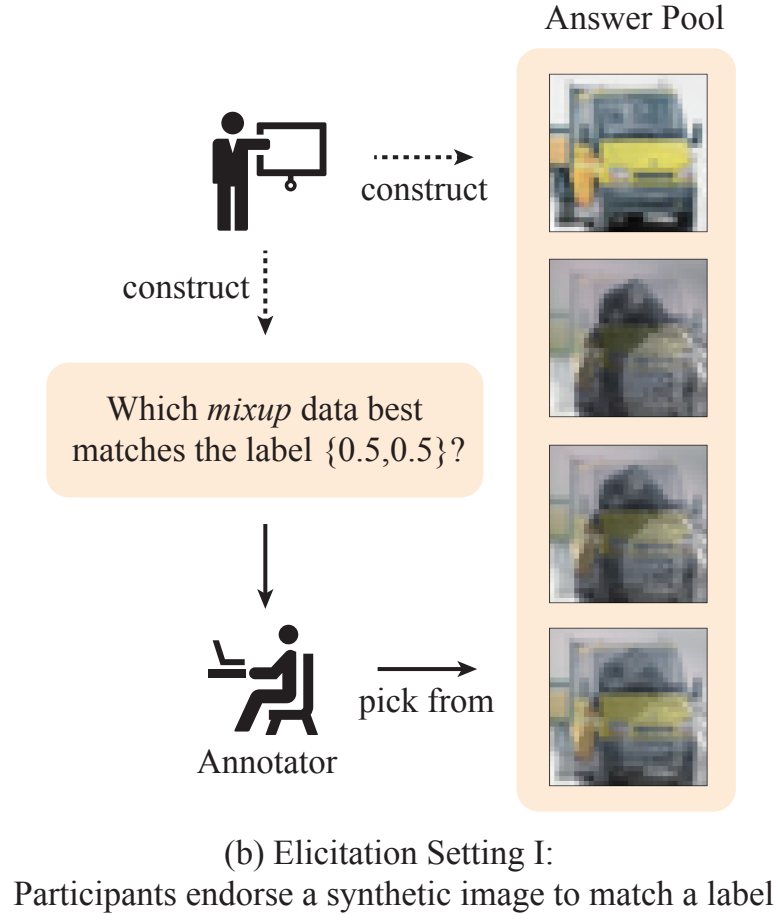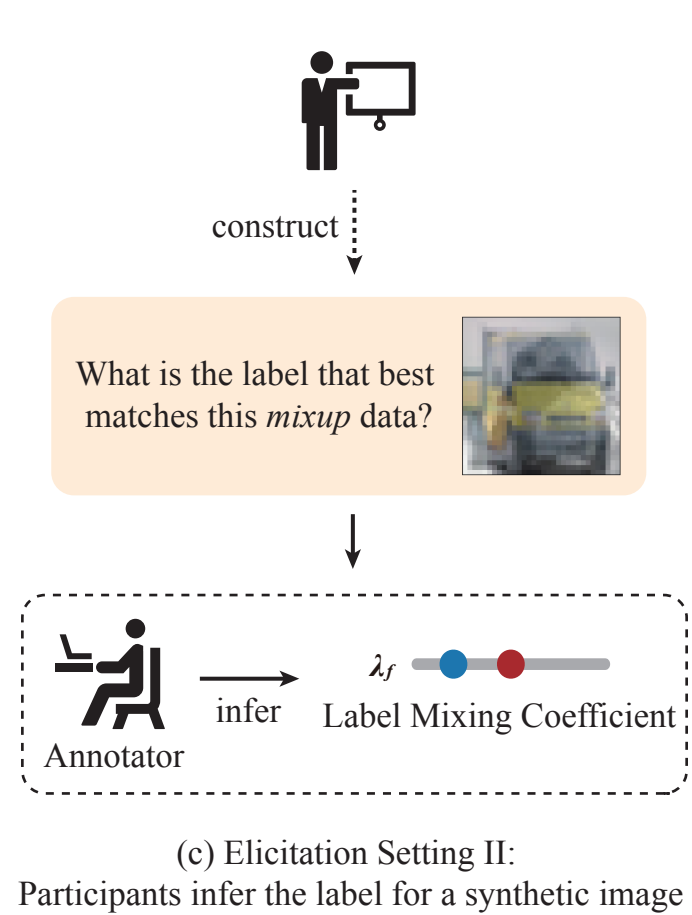

Supplement: supplementary_material [file attachment]

# Aggregate Elicited 50/50 Point Across Pairs

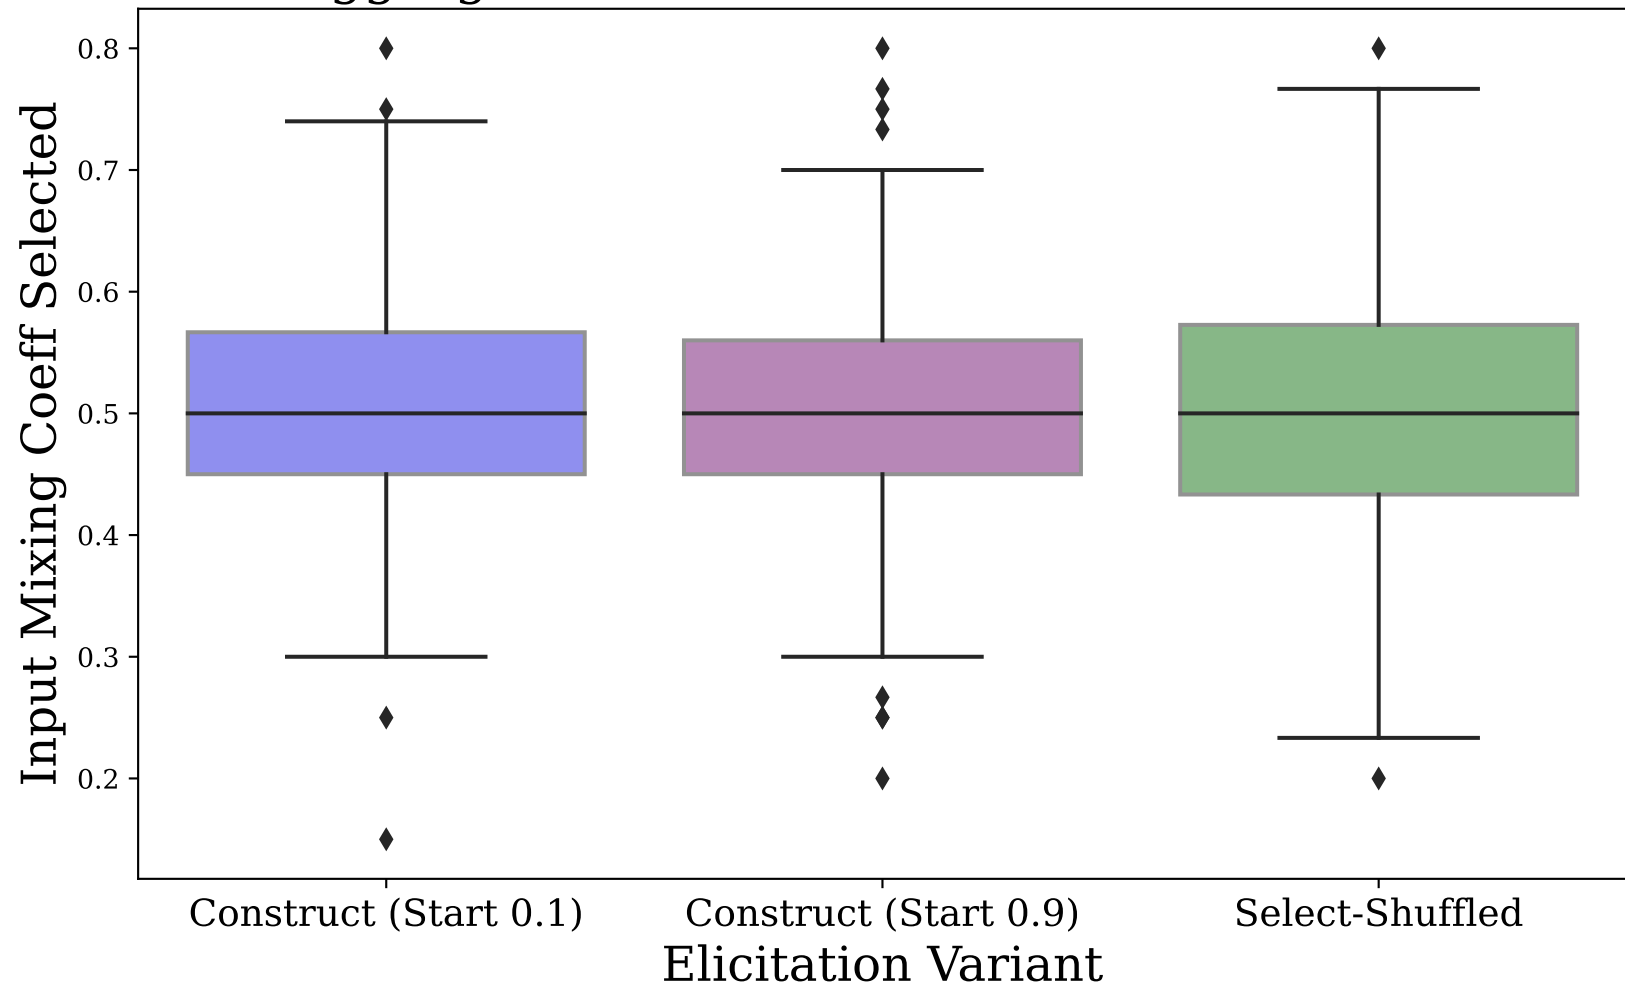

Supplement: supplementary_material [file attachment]
